# Supplementary material
Source: publisher figshare collection journal article supplement (https://tandf.figshare.com/ndownloader/files/17290367)

# **Dual-target anti-Alzheimer's disease agents with both iron ion chelating and monoamine oxidase-B inhibitory activity**

Zhisheng Mi <sup>a, #</sup>, Bing Gan <sup>a, b, #</sup>, Sihang Yu <sup>c, #</sup>, Jianan Guo <sup>a</sup>, Changjun Zhang <sup>a</sup>,  
Xiaoying Jiang <sup>a</sup>, Tao Zhou<sup>d</sup>, Jing Su <sup>d, \*</sup>, Renren Bai <sup>a, \*</sup>, Yuanyuan Xie <sup>a, e, \*</sup>

<sup>a</sup>College of Pharmaceutical Science, Zhejiang University of Technology, Hangzhou, China

<sup>b</sup>Guiyang Institute for Food and Drug Control, Guiyang, China

<sup>c</sup>Department of Pathophysiology, College of Basic Medical Sciences, Jilin University, Changchun, China

<sup>d</sup>School of Food Science and Biotechnology, Zhejiang Gongshang University, Hangzhou, China

<sup>e</sup>Collaborative Innovation Center of Yangtze River Delta Region Green Pharmaceuticals, Zhejiang University of Technology, Hangzhou, China

<sup>#</sup>These authors contributed equally to this work

## **Correspondence:**

**Dr. Yuanyuan Xie**, Key Laboratory for Green Pharmaceutical Technologies and Related Equipment of Ministry of Education, College of Pharmaceutical Sciences, Zhejiang University of Technology, Hangzhou 310014, China. Email: xyycz@zjut.edu.cn

**Dr. Renren Bai**, College of Pharmaceutical Sciences, Zhejiang University of Technology, Hangzhou 310014, China. Email: renrenbai@zjut.edu.cn

**Dr. Jing Su**, Department of Pathophysiology, College of Basic Medical Sciences, Jilin University, Changchun, China. Email: sujing@jlu.edu.cn

27a

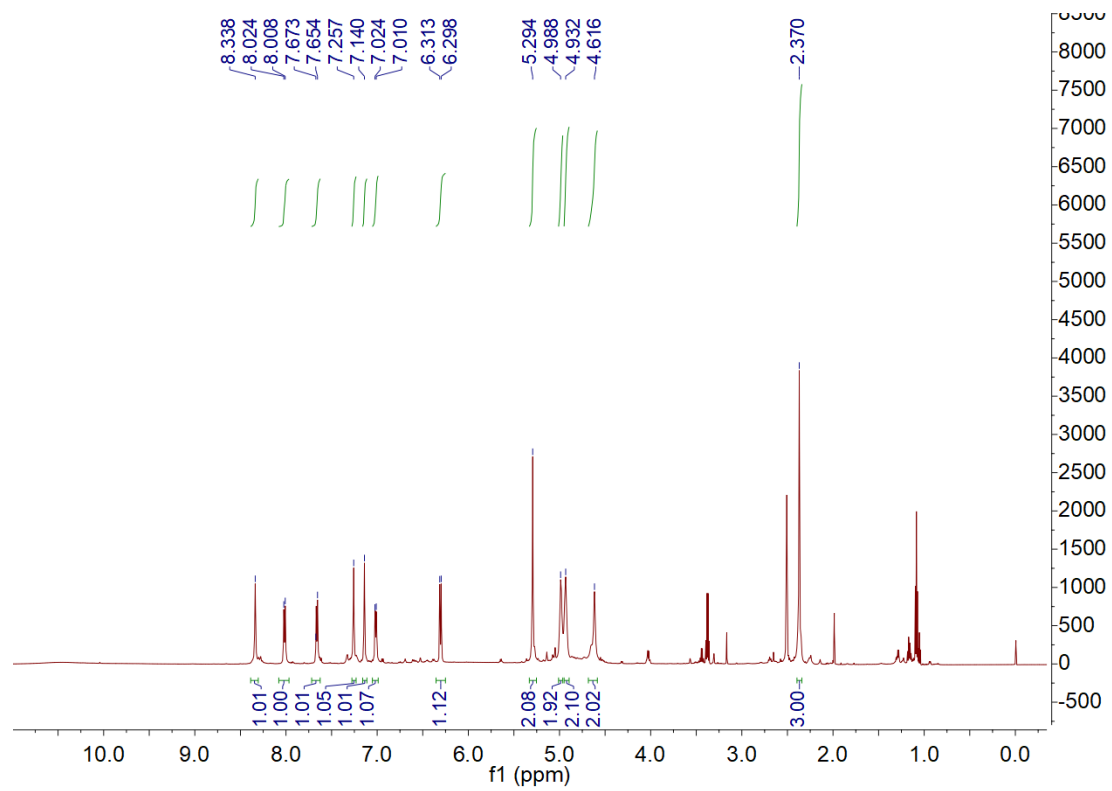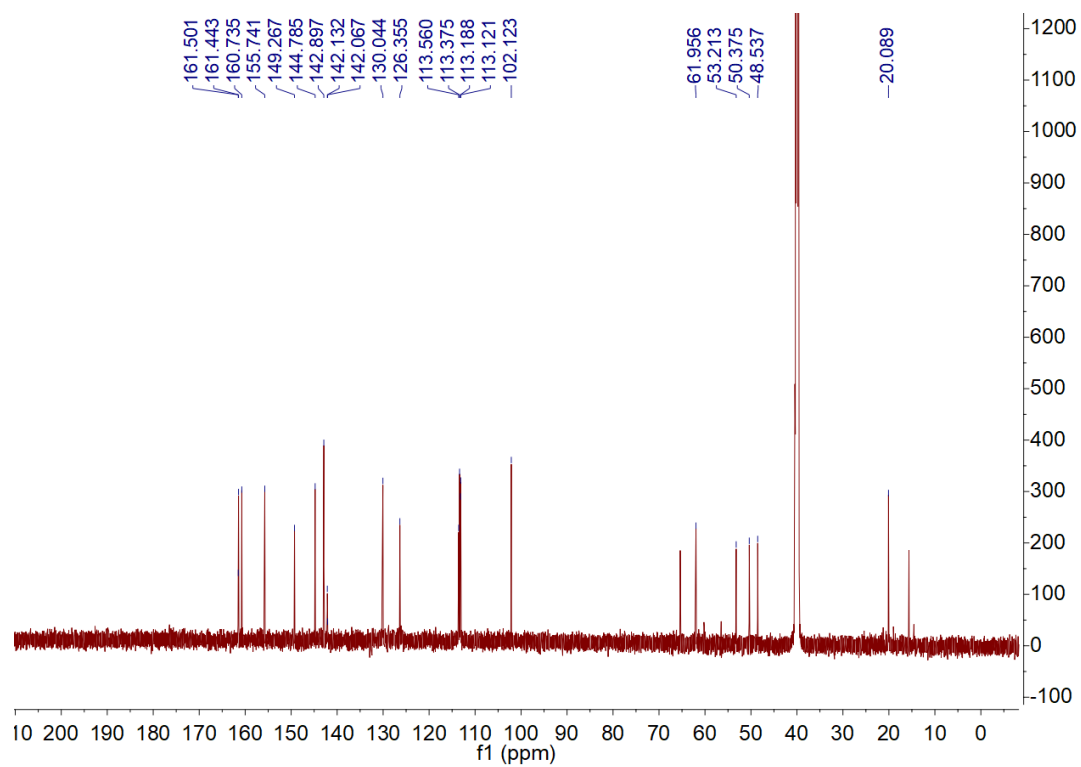

27b

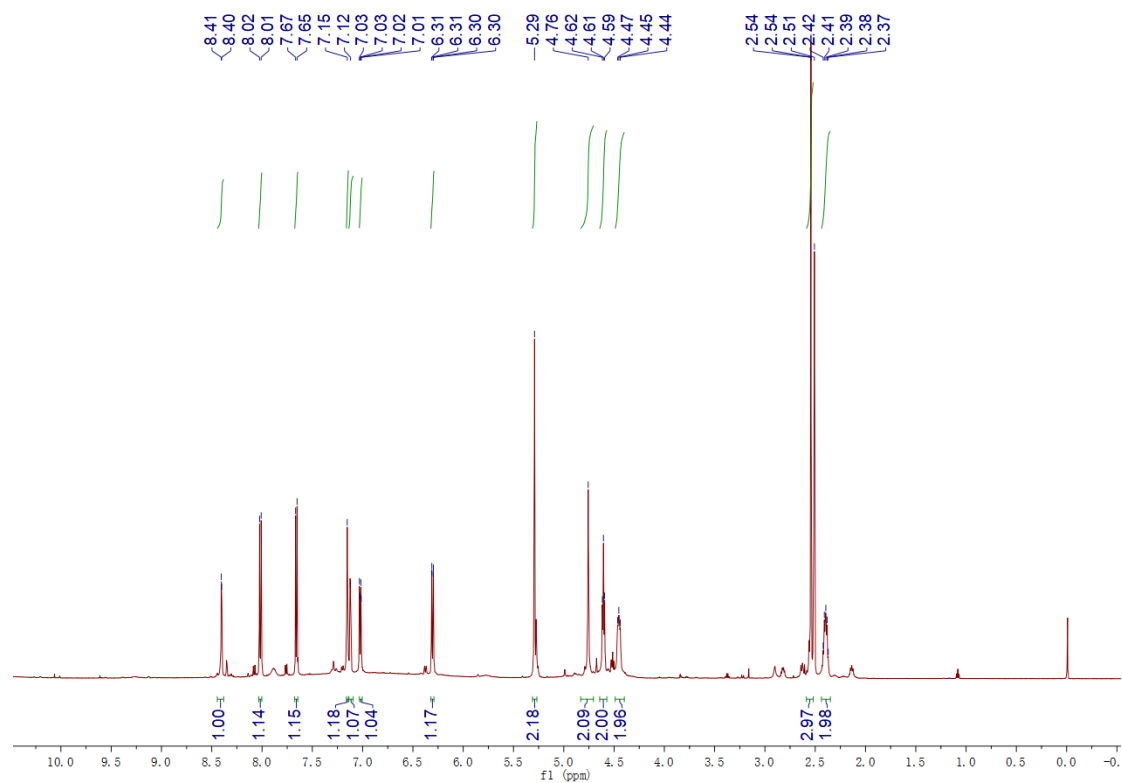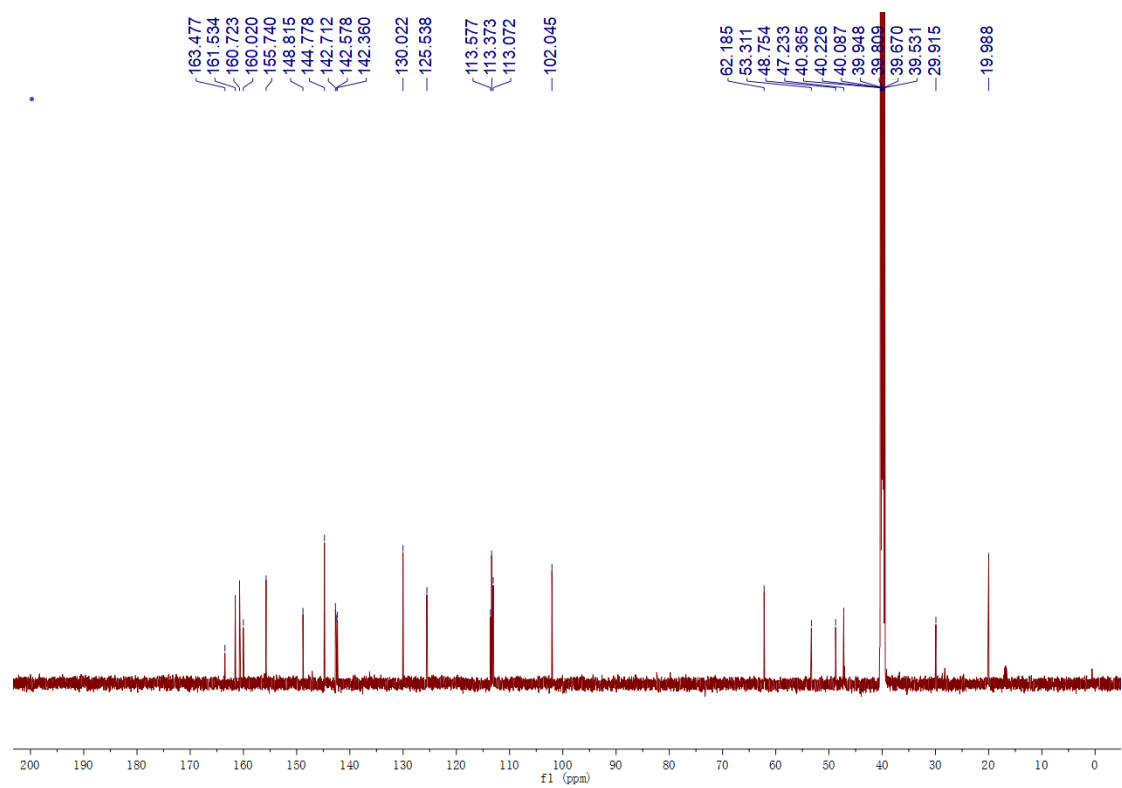

27c

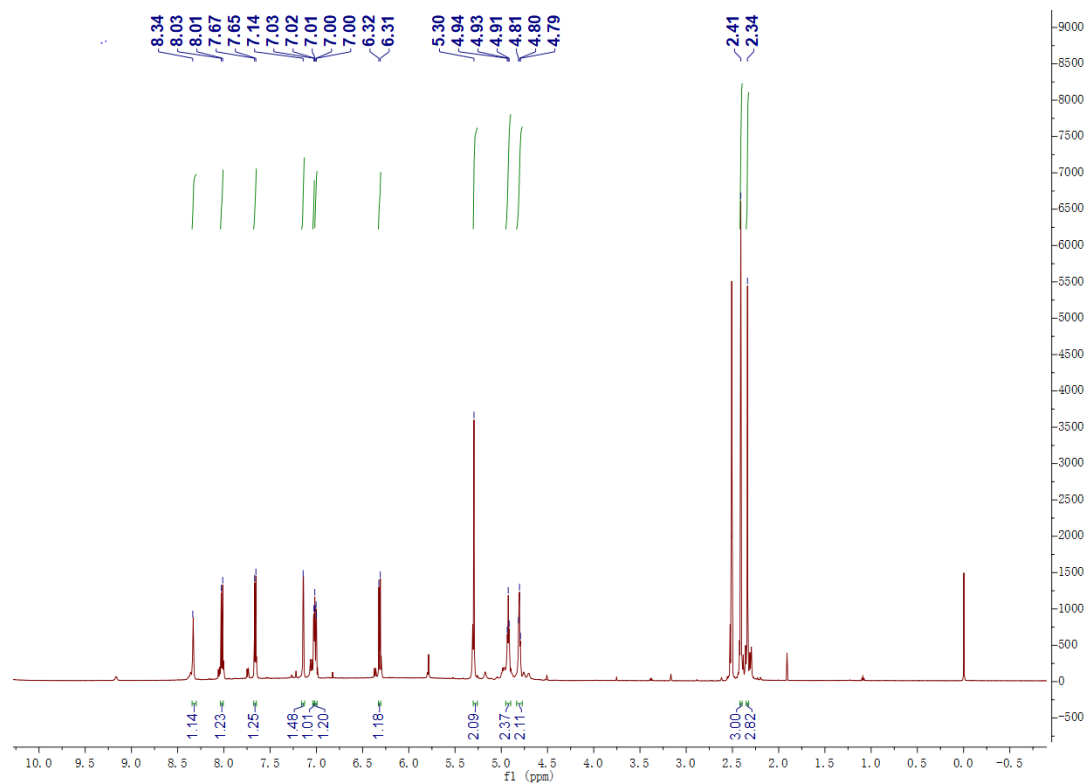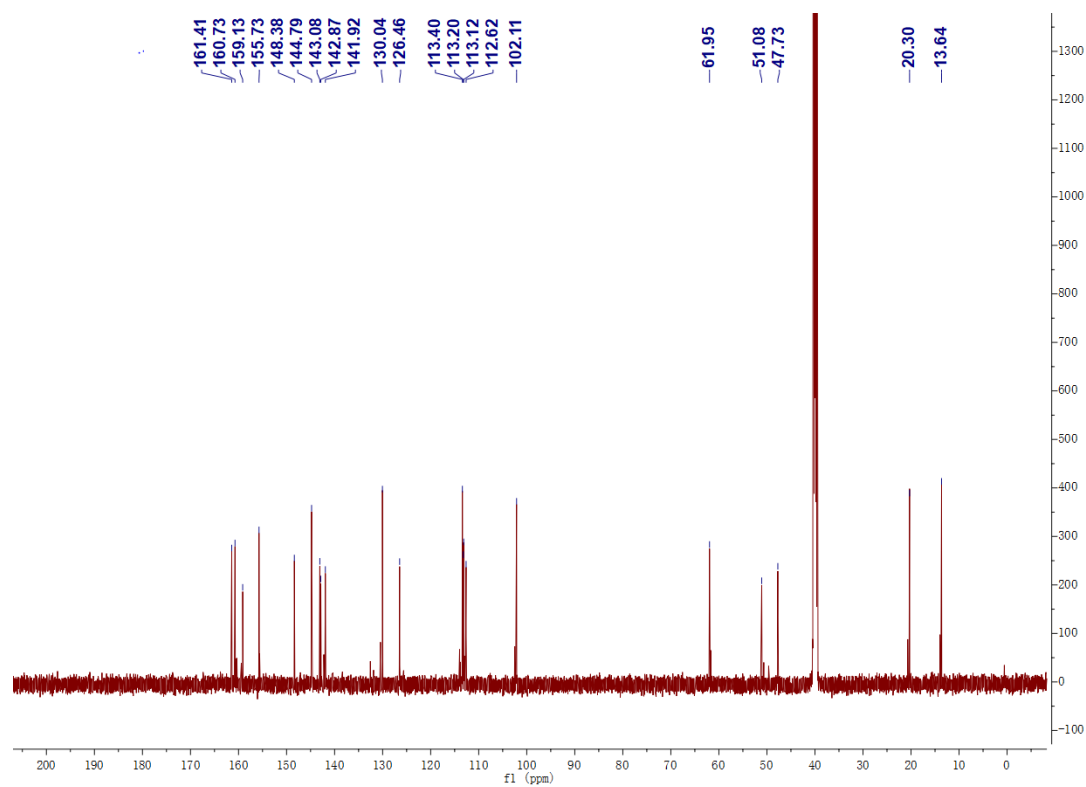

27d

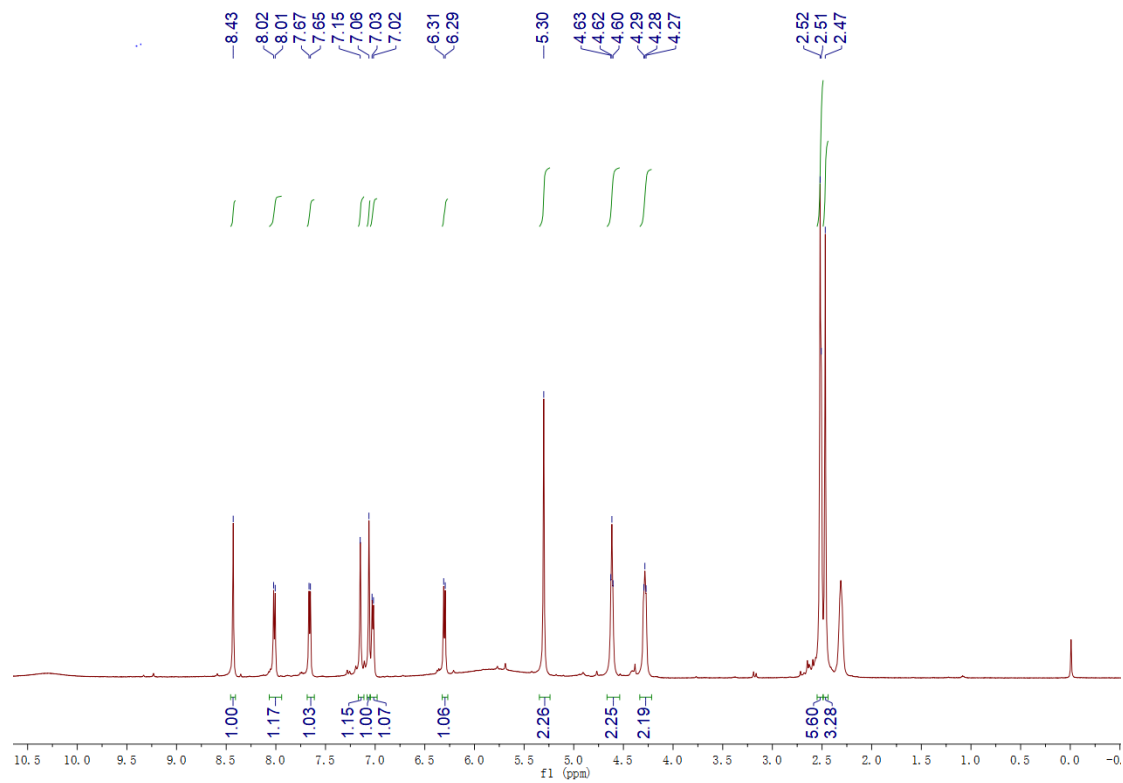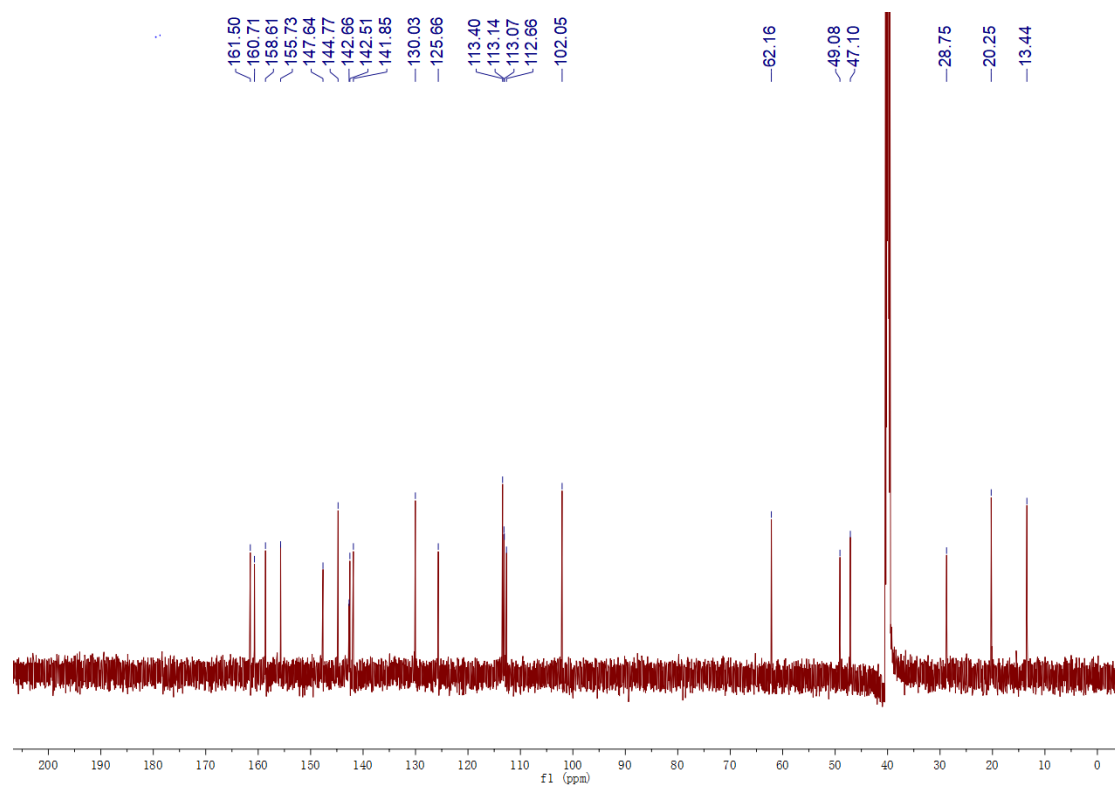

27e

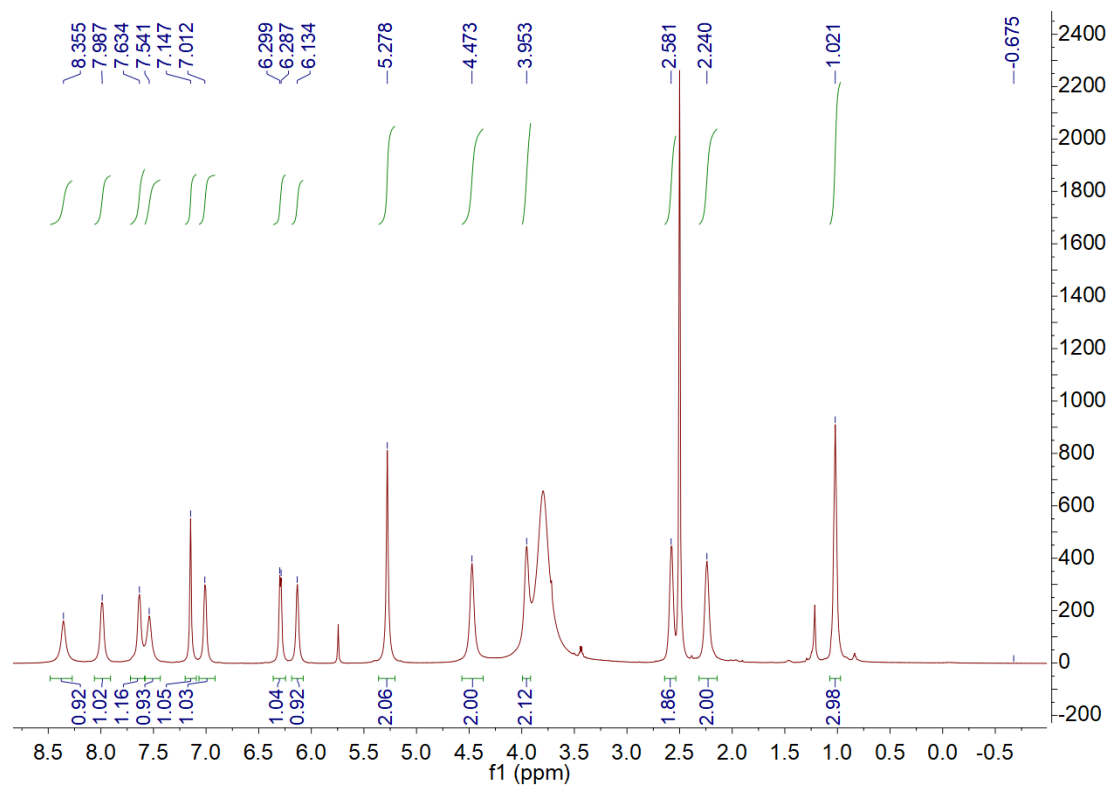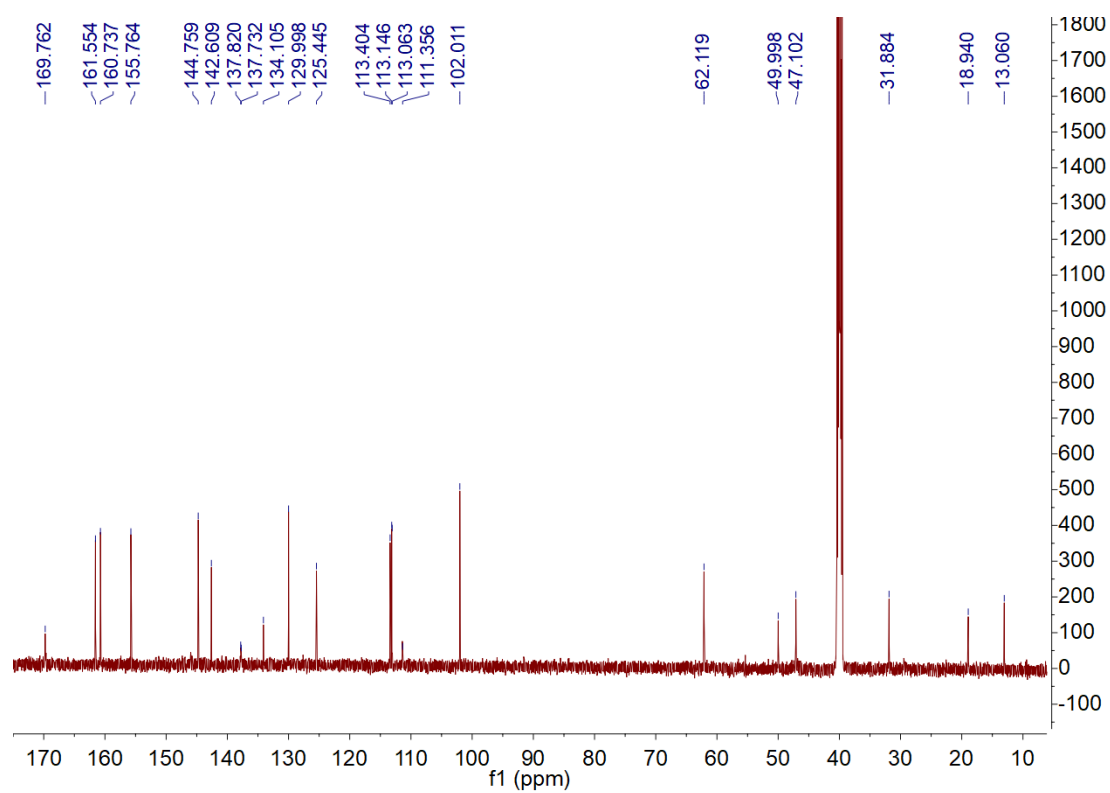

27f

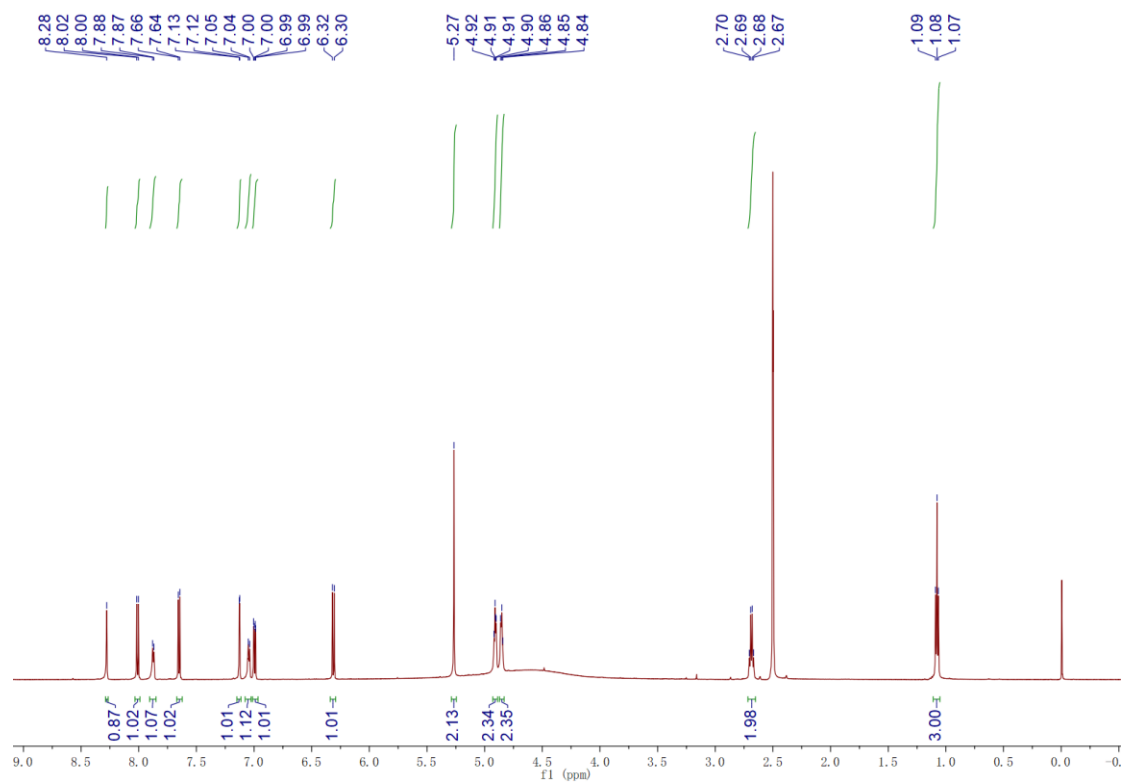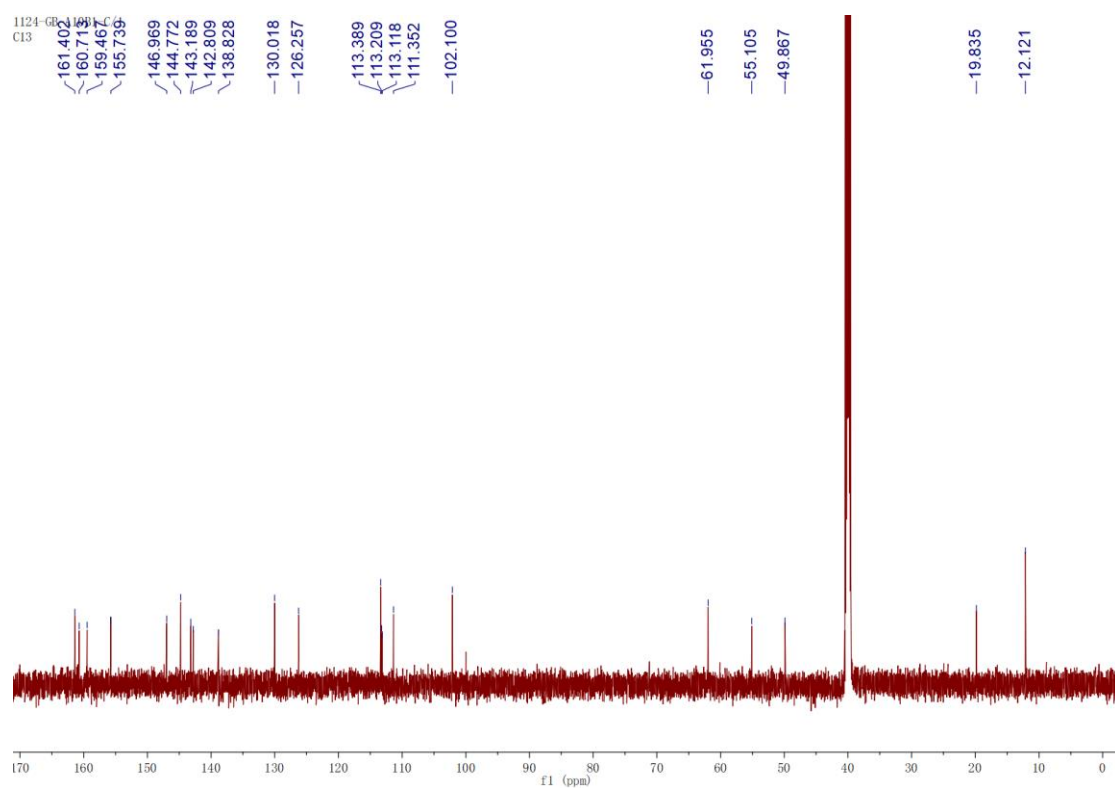

27g

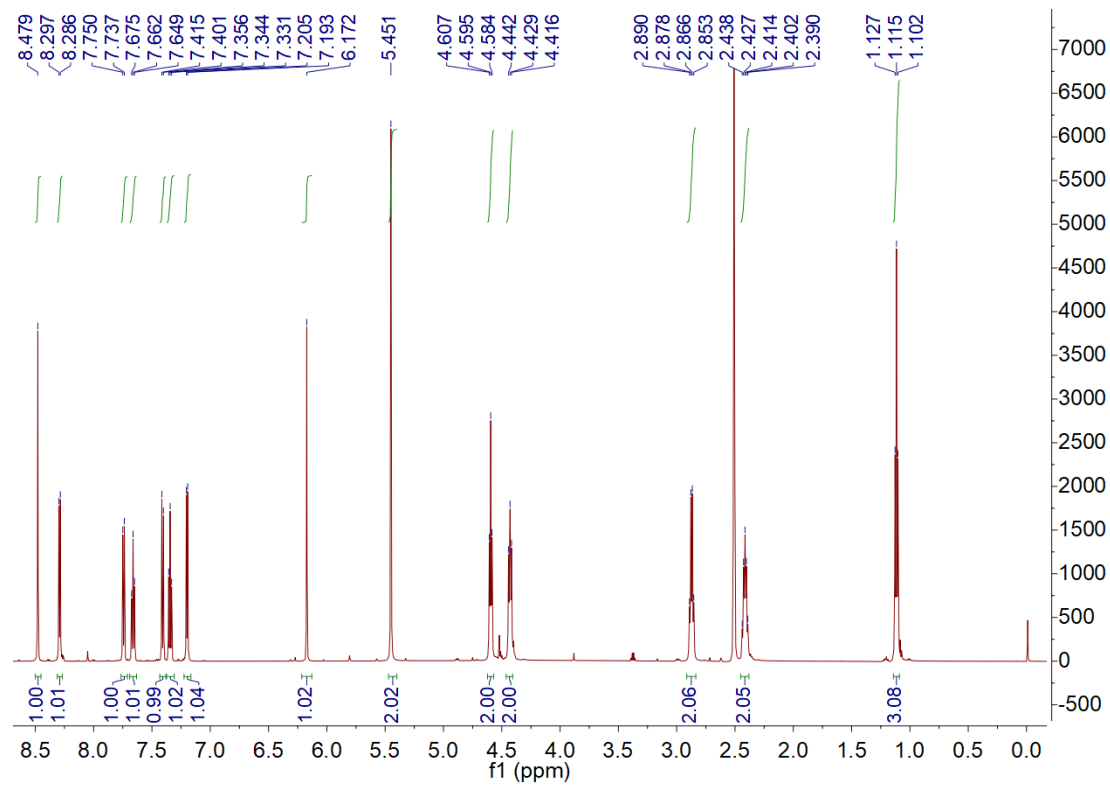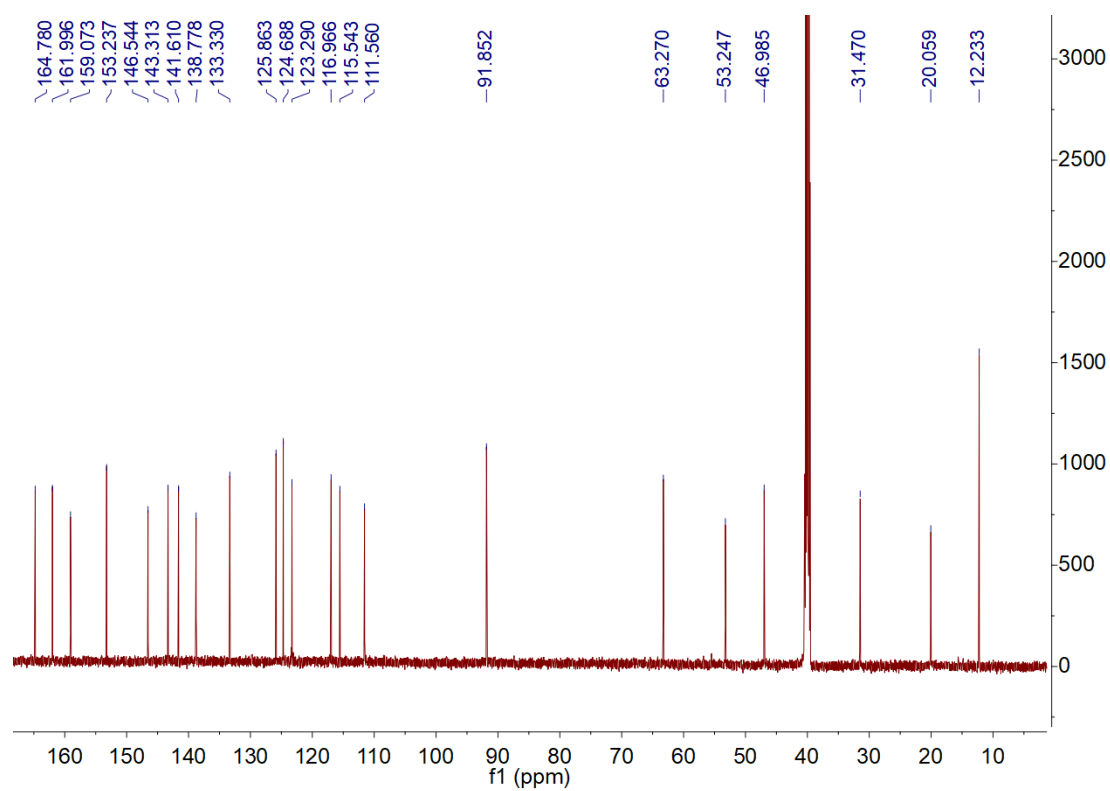



27h

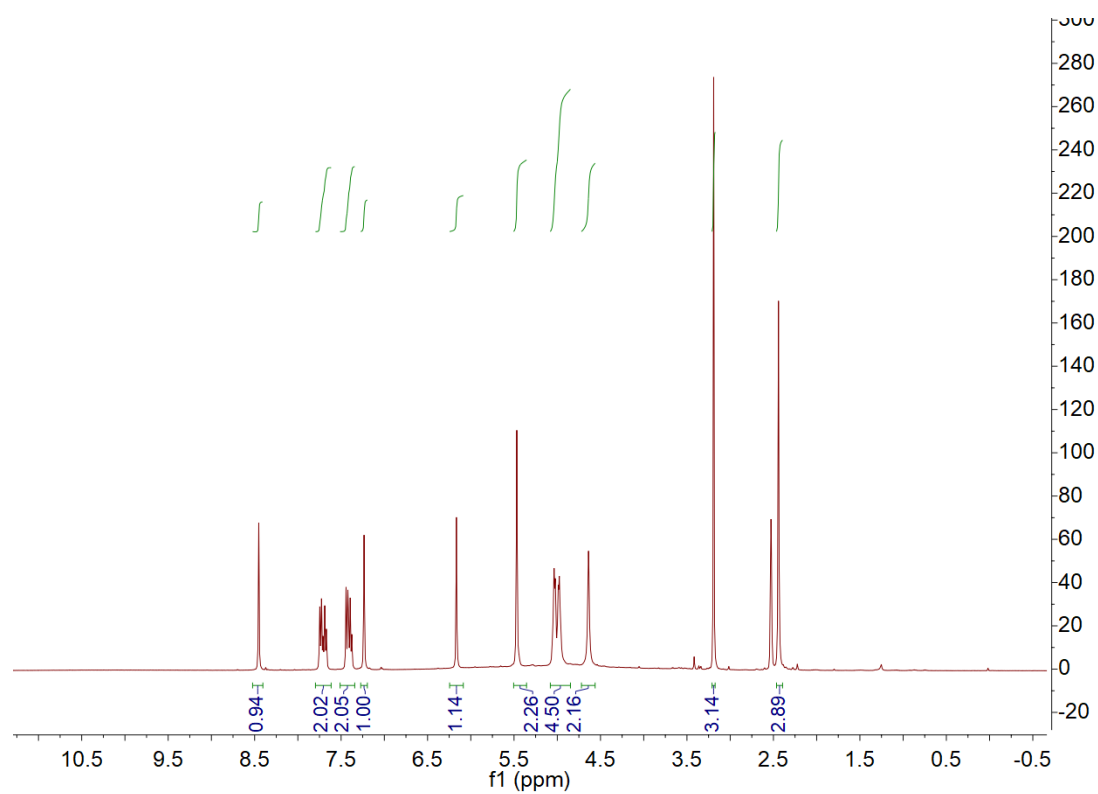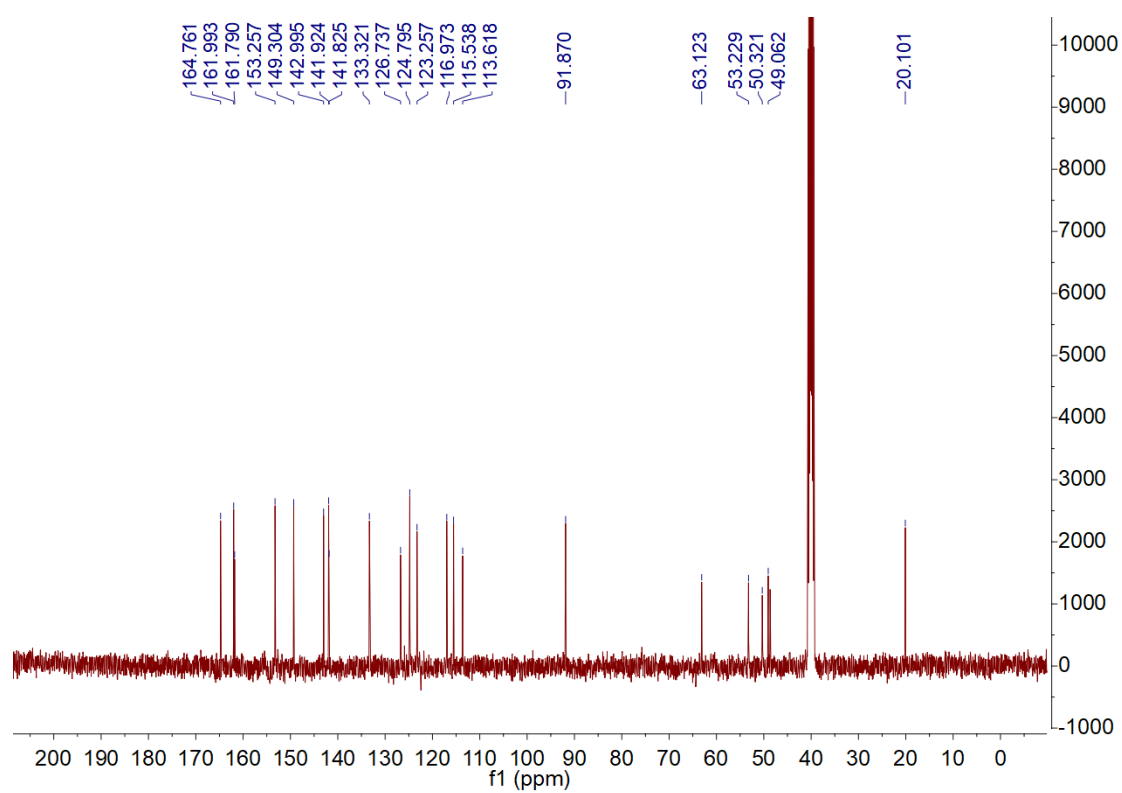

27i

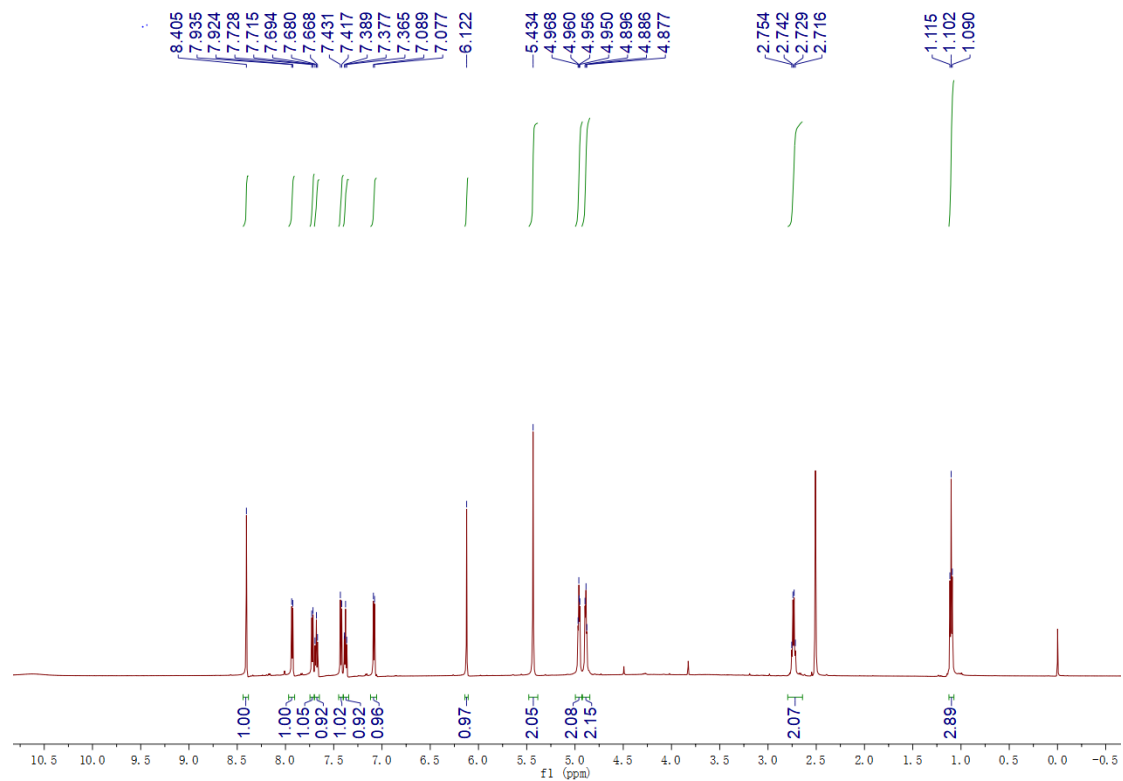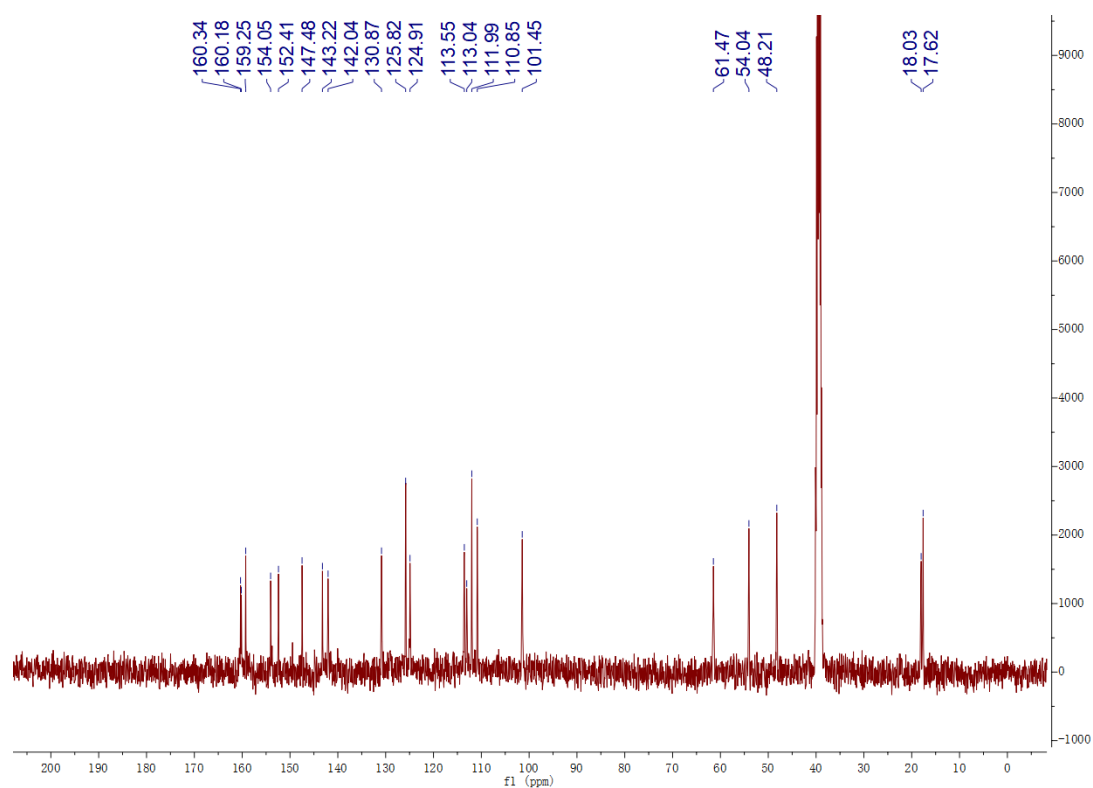

27j

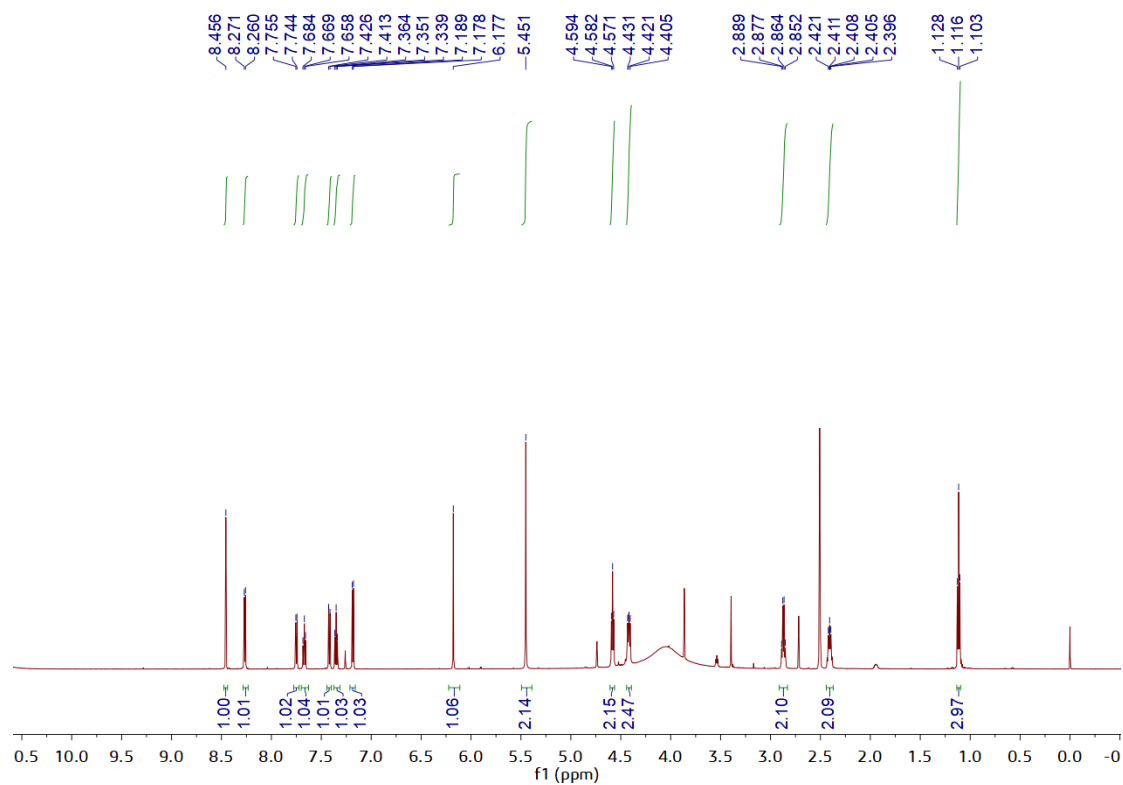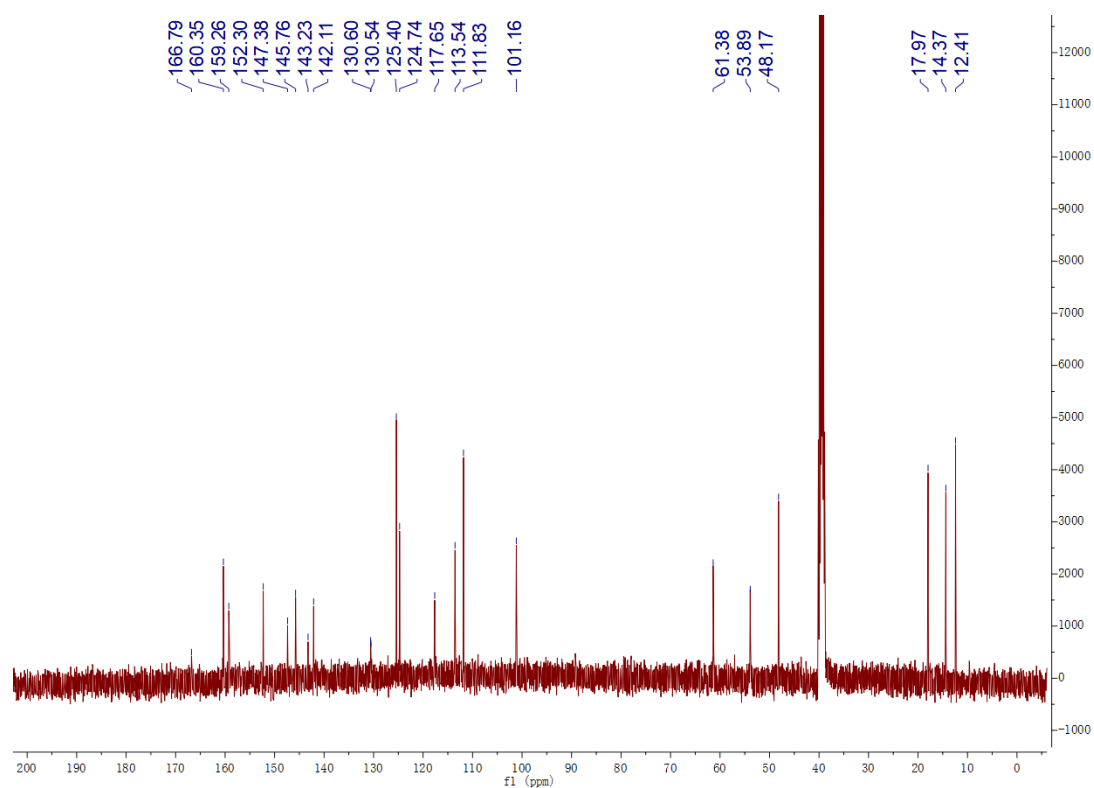

27k

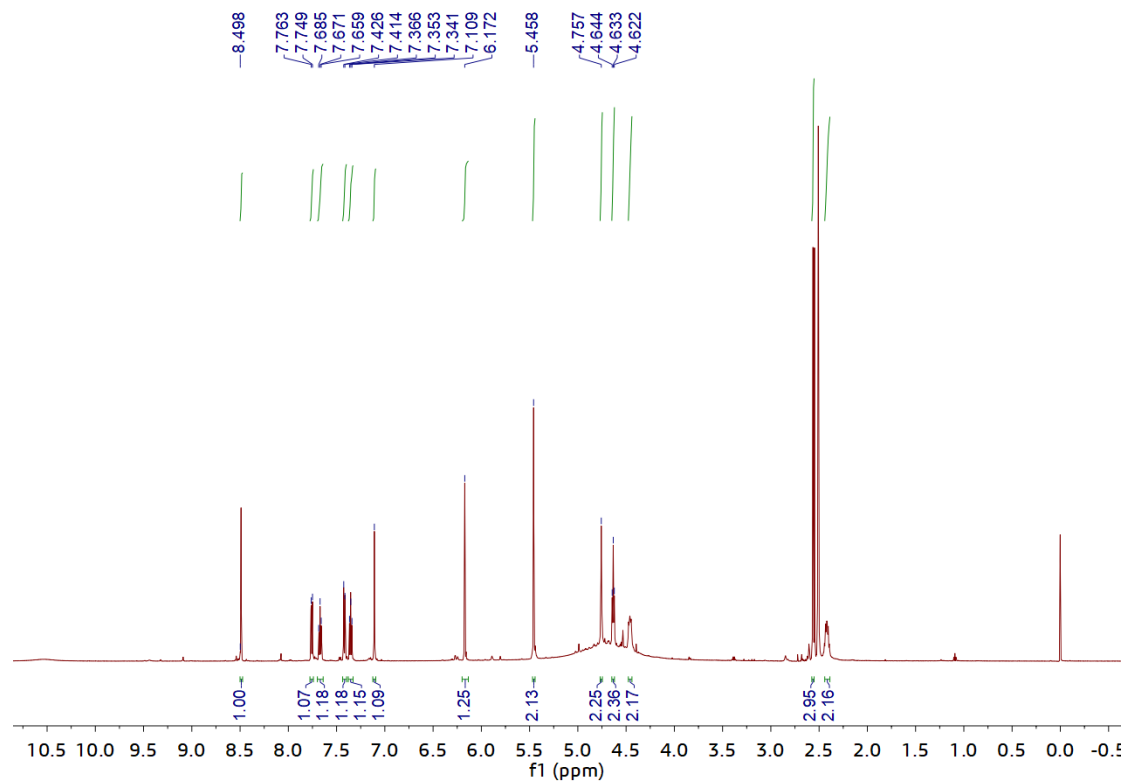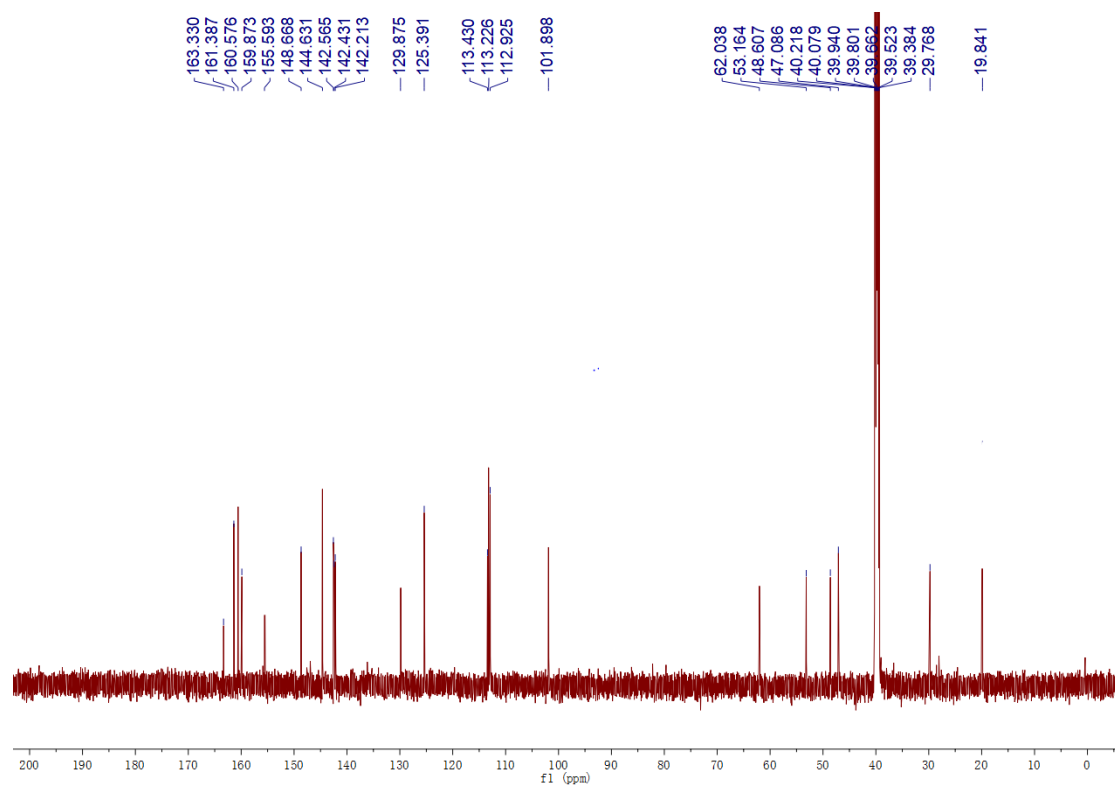

Supplement: Supplementary file [file 17290367]
